# Supplementary material for: Facile preparation route for graphene oxide reinforced polyamide 6 composites via in situ anionic ring-opening polymerization
Source: Royal Society of Chemistry journal article supplement (doi:10.1039/c2jm34243j), 2012-01-01
Supplement: c2jm34243j.pdf [file c2jm34243j.pdf]

## Facile preparation route for graphene oxide reinforced polyamide 6 composites

### via in situ anionic ring-opening polymerization

### (Supporting Information)

Xiaoqing Zhang, Xinyu Fan <sup>\*</sup>, Hongzhou Li, Chun Yan

Ningbo Key Laboratory of Polymer Material, Ningbo Institute of Material Technology and

Engineering, Chinese Academy of Sciences, Ningbo 315201, China

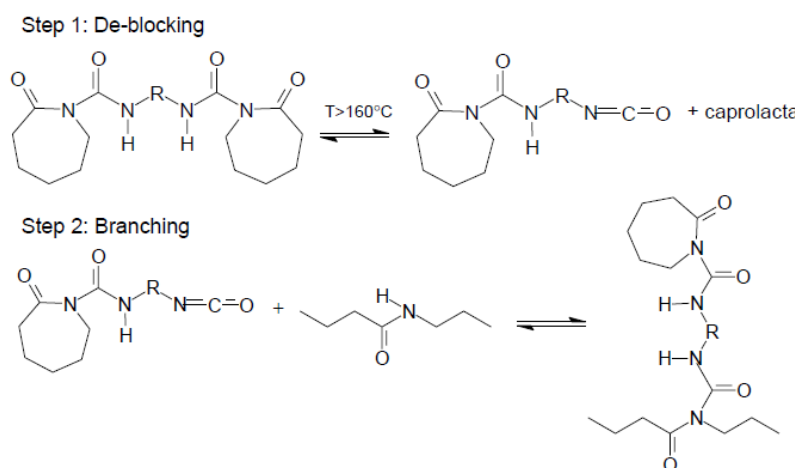

**Figure S1** Reaction scheme for branching that take place during anionic polymerization of caprolactam when using a difunctional blocked isocyanate activator.[Polym Test 2005;25:392-404]

### Differential scanning calorimetry procedures

The non-isothermal analyses were carried out using a Perkin Elmer DSC-7 differential scanning calorimeter thermal analyzer. About 10 mg of the polymer sample was weighted very accurately in the aluminium differential scanning calorimetry (DSC) pan and placed in the DSC cell. It was heated from 25 °C to 250 °C at a rate of 30 °C/min under nitrogen atmosphere. The sample was kept for 2 min at

<sup>\*</sup> Corresponding author, Fax: +86-574-86685802, Email: [xinyu.fan@nimte.ac.cn](mailto:xinyu.fan@nimte.ac.cn)

this temperature to eliminate the heat history before cooling at a specified cooling rate. Constant cooling rate 10, 15, 20, 25 and 30 °C/min were applied. The thermograms corresponding to the heating and cooling cycles were recorded and analyzed to estimate the non-isothermal crystallization kinetics and crystallinity degree.

The Non-isothermal crystallization kinetics model is according to the literature [European Polymer Journal 2002, 38, 1383-1389; Thermochemica Acta 2010, 500, 13–20].

**Table S1 Value of  $T_o$ ,  $T_c$ ,  $\Delta H$ ,  $n$ ,  $Z_t$  and  $t_{1/2}$  at various cooling rates for PA6 and PA6-GO nanocomposite**

| Cooling rate<br>(°C/min) | Onset $T_o$<br>(°C) | End T<br>(°C) | $T_c$<br>(°C) | $\Delta H$<br>(J/g) | $n$  | $Z_t$ | $t_{1/2}$<br>(min) |
|--------------------------|---------------------|---------------|---------------|---------------------|------|-------|--------------------|
| PA6                      |                     |               |               |                     |      |       |                    |
| 10                       | 173.5               | 162.7         | 168.2         | 46.63               | 3.57 | 1.07  | 0.886              |
| 15                       | 168.6               | 156.7         | 162.7         | 43.11               | 3.70 | 2.91  | 0.679              |
| 20                       | 165.8               | 152.7         | 159.2         | 42.23               | 3.67 | 6.20  | 0.551              |
| 25                       | 163.8               | 149.6         | 156.8         | 41.80               | 3.59 | 11.63 | 0.456              |
| 30                       | 162.0               | 147.0         | 154.6         | 39.91               | 3.02 | 17.97 | 0.340              |
| PA-GO-0.05               |                     |               |               |                     |      |       |                    |
| 10                       | 178.0               | 166.7         | 173.4         | 47.47               | 2.81 | 0.96  | 0.891              |
| 15                       | 175.6               | 164.2         | 170.91        | 47.35               | 3.27 | 2.61  | 0.666              |
| 20                       | 173.7               | 161.9         | 168.79        | 47.07               | 3.63 | 4.79  | 0.587              |
| 25                       | 172.0               | 160.0         | 167.18        | 47.18               | 3.56 | 9.10  | 0.486              |
| 30                       | 170.6               | 158.4         | 165.56        | 45.53               | 3.55 | 17.27 | 0.404              |
| PA-GO-0.2                |                     |               |               |                     |      |       |                    |
| 10                       | 185.16              | 173.7         | 180.3         | 51.00               | 3.02 | 0.87  | 0.927              |
| 15                       | 182.27              | 170.3         | 177.1         | 49.71               | 3.15 | 2.41  | 0.673              |
| 20                       | 180.12              | 167.7         | 174.7         | 49.46               | 3.50 | 4.91  | 0.571              |
| 25                       | 178.39              | 165.4         | 172.9         | 49.25               | 3.57 | 8.80  | 0.491              |
| 30                       | 177.23              | 163.6         | 171.5         | 49.96               | 3.43 | 15.34 | 0.405              |
| PA-GO-1.0                |                     |               |               |                     |      |       |                    |
| 10                       | 184.17              | 170.8         | 178.4         | 51.11               | 3.12 | 0.68  | 1.005              |
| 15                       | 180.90              | 166.7         | 174.9         | 49.27               | 3.13 | 1.85  | 0.731              |
| 20                       | 178.65              | 163.6         | 172.1         | 49.00               | 3.39 | 3.41  | 0.625              |
| 25                       | 176.94              | 161.2         | 170.1         | 47.88               | 3.20 | 6.22  | 0.504              |
| 30                       | 175.74              | 159.6         | 169.1         | 45.36               | 3.23 | 9.85  | 0.441              |

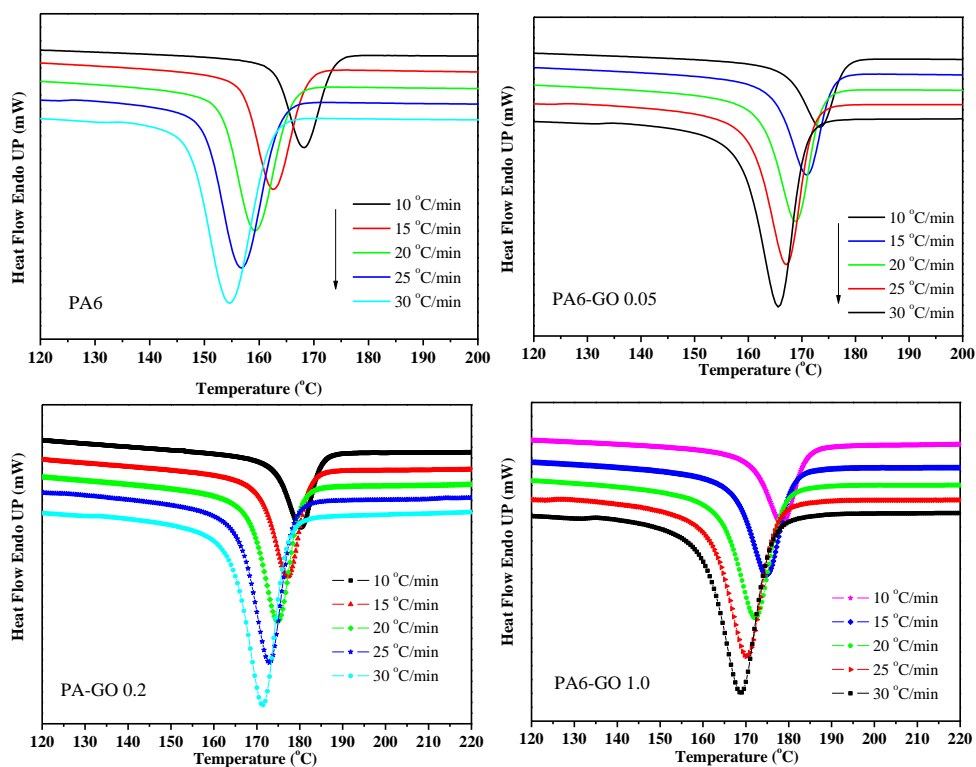

**Figure S2.** DSC thermograms of non-isothermal crystallization at different cooling rates for PA6 and PA6-GO nano composite with different g-GO loadings.

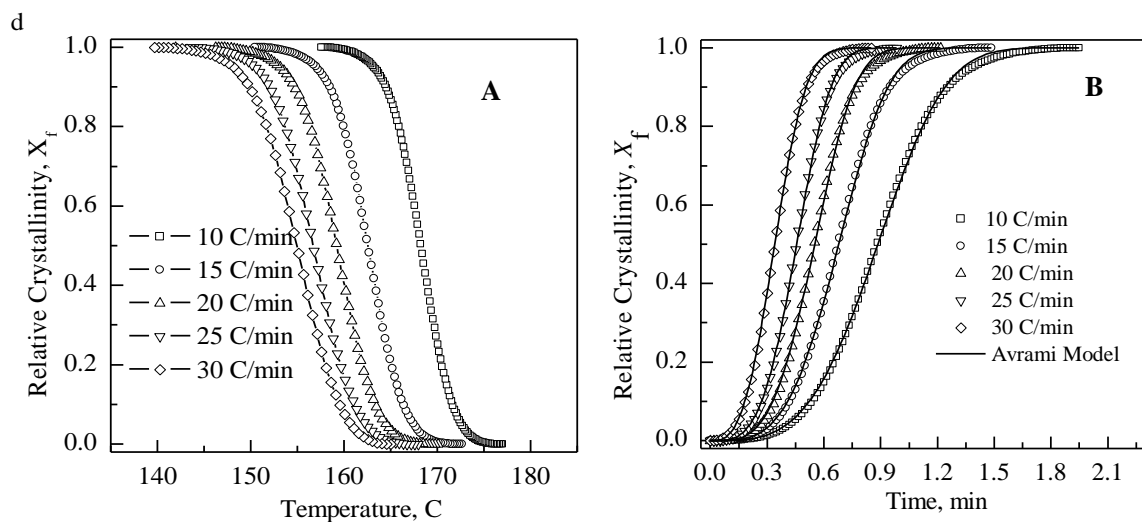

**Figure S3.** Plot of relative crystallinity as a function of temperature (A) and time (B) for neat PA6 crystallized non-isothermally at various cooling.

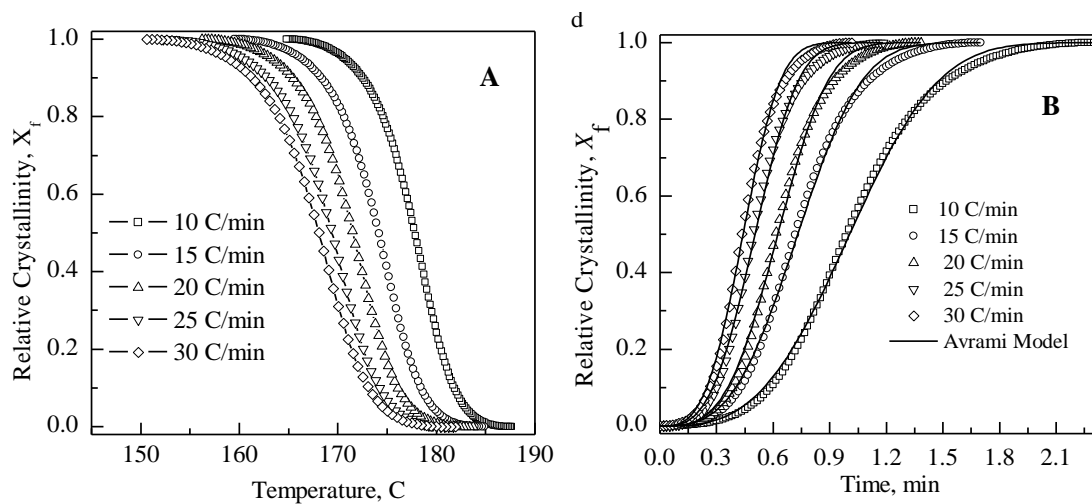

**Figure S4** Polt of relative crystallinity as a function of temperature (A) and time (B) for neat PA6 crystallized non-isothermally at various cooling.

**Table S2. X-ray diffraction parameters of neat PA6 and PA6-GO nanocomposites**

| Sample      | $2\theta_1$ | $2\theta_2$ | $I_1$ | $I_2$ | $I_1/I_2$ |
|-------------|-------------|-------------|-------|-------|-----------|
| PA6         | 20.0°       | 23.9        | 352   | 239   | 1.47      |
| PA6-GO-0.01 | 19.9        | 23.7        | 93    | 250   | 0.37      |
| PA6-GO-0.05 | 20.3        | 24.1        | 118.7 | 264   | 0.45      |
| PA6-GO-0.1  | 20.3        | 24.0        | 171   | 295   | 0.58      |
| PA6-GO-0.2  | 20.3        | 24.1        | 164   | 351   | 0.46      |
| PA6-GO-0.5  | 20.3        | 24.0        | 120   | 240   | 0.51      |
| PA6-GO-1.0  | 20.2        | 23.9        | 154   | 232   | 0.52      |
